# Supplementary material for: Rational construction of micro-plate-like iron oxide/aluminium oxide-fabricated screen-printed carbon electrode for the electrochemical detection of the antiandrogen drug
Source: Royal Society of Chemistry journal article supplement (doi:10.1039/d3en00808h), 2024-01-01
Supplement: d3en00808h1.pdf [file d3en00808h1.pdf]

## **Rational construction of micro-plate like iron oxide/aluminium oxide fabricated screen printed carbon electrode for the electrochemical detection of antiandrogen drug**

Sivakumar Musuvadhi Babulal<sup>a,‡</sup>, Nandini Nataraj<sup>a,‡</sup>, Tse-Wei Chen<sup>b,\*</sup>, Shen Ming Chen<sup>a\*</sup>, Bih-Show Lou<sup>c,d\*</sup>, Arshad Mehmood Abbasi<sup>e,f</sup>, Amal M. Al-Mohaimed<sup>g</sup>, Mohamed Soliman Elshikh<sup>h</sup>, Jaysan Yu<sup>i</sup>

<sup>a</sup> Department of Chemical Engineering and Biotechnology, College of Engineering, National Taipei University of Technology, No. 1, Section 3, Chung-Hsiao East Road, Taipei, Taiwan 106 (ROC).

<sup>b</sup>Department of Materials, Imperial College London, London, SW7 2AZ, United Kingdom

<sup>c</sup>Chemistry Division, Center for General Education, Chang Gung University, Taoyuan 333, Taiwan.

<sup>d</sup>Department of Orthopaedic Surgery, New Taipei Municipal TuCheng Hospital, Chang Gung Memorial Hospital, New Taipei City, 236, Taiwan.

<sup>e</sup>University of Gastronomic Sciences, Piazza Vittorio Emanuele II, 9, 12042, Pollenzo, CN, Italy.

<sup>f</sup>Department of Environmental Sciences, COMSATS University Islamabad, Abbottabad Campus 22060, Pakistan

<sup>g</sup>Department of Chemistry, College of Science, King Saud University, P.O. Box 22452, Riyadh 11495, Saudi Arabia.

<sup>h</sup>Department of Botany and Microbiology, College of Science, King Saud University, Riyadh 11451, Saudi Arabia

<sup>i</sup> Well Fore special wire corporation, 10, Tzu-Chiang 7rd., Chung-Li Industrial Park, Taoyuan, Taiwan

\*Corresponding author: [twchenchem@gmail.com](mailto:twchenchem@gmail.com) (T.-W. Chen); [smchen78@ms15.hinet.net](mailto:smchen78@ms15.hinet.net) (S.-M. Chen); [blou@mail.cgu.edu.tw](mailto:blou@mail.cgu.edu.tw) (B.-S. Lou)

‡- equally contributed to this work.

## **S1. Materials and characterization techniques**

The chemicals for synthesis of FeAlO were iron nitrate  $\geq 98.0\%$ , aluminium chloride 99.0%, urea 100.5%, and ammonium hydroxide  $\geq 99.99\%$ . While the chemicals used for the electrochemical sensing were nilutamide (NTM)  $\geq 99.99\%$ , 4-nitrophenol  $\geq 99.0\%$ , aminophenol  $\geq 98.0\%$ , nitrobenzene  $\geq 99.0\%$ , acetaminophen  $\geq 98.0\%$ , flutamide  $\geq 99.99\%$ , chlorine ions  $\geq 99.99\%$ , sodium ions  $\geq 99.99\%$ , glucose  $\geq 99.5\%$ , mercury  $\geq 99.99\%$ , mesalamine  $\geq 99.0\%$ , ciprofloxacin  $\geq 98.0\%$ , carbendazim  $\geq 97.0\%$ , nifedipine  $\geq 98.0\%$ , and hydroquinone  $\geq 98.0\%$ . These chemicals and reagents as bought from Sigma Aldrich; Taiwan were directly taken for the reaction to be conducted without undergoing any purification steps. Ethanol and deionized (DI) water were used to clean and for conducting other experiments.

Characterization techniques as XRD, XPS, Raman, FESEM, and EDAX were carried out to explore the analysis of FeAlO. The XRD study was done with an X-ray diffractometer (PANalytical XPert PRO), with Cu-K $\alpha$  radiation ( $\lambda=0.1541$  nm). The XPS analysis employed with X-ray photoelectron spectroscopy (XPS-ESCALAB 250, THERMO SCIENTIFIC Ltd, Netherlands). The presence of functional groups in the samples was identified with Perkin-Elmer Fourier transforms infrared spectrometer (CHI 1000 C, FT-IR-6600). The Field emission scanning electron microscope (FESEM) with ZEISS Sigma 300 SEM microscope coupled with energy-dispersive X-ray spectroscopy (EDX) for morphology analysis. The electrochemical studies were done with cyclic voltammetry (CV), and differential pulse voltammetry (DPV) techniques with CHI1205C, and CHI900. The electrochemical setup with the three-electrode system was utilized with the working electrode as a screen-printed carbon electrode (electrochemical sensing) (surface area – 0.035 cm<sup>2</sup>). The reference electrode employed was Ag/AgCl (3.5 M KCl) electrode and the counter electrode was a platinum

wire. The NTM concentration study were analyzed by DPV, for this study the potential ranges 0.3 to -0.9 V and 0.1 M PB solution were performed.

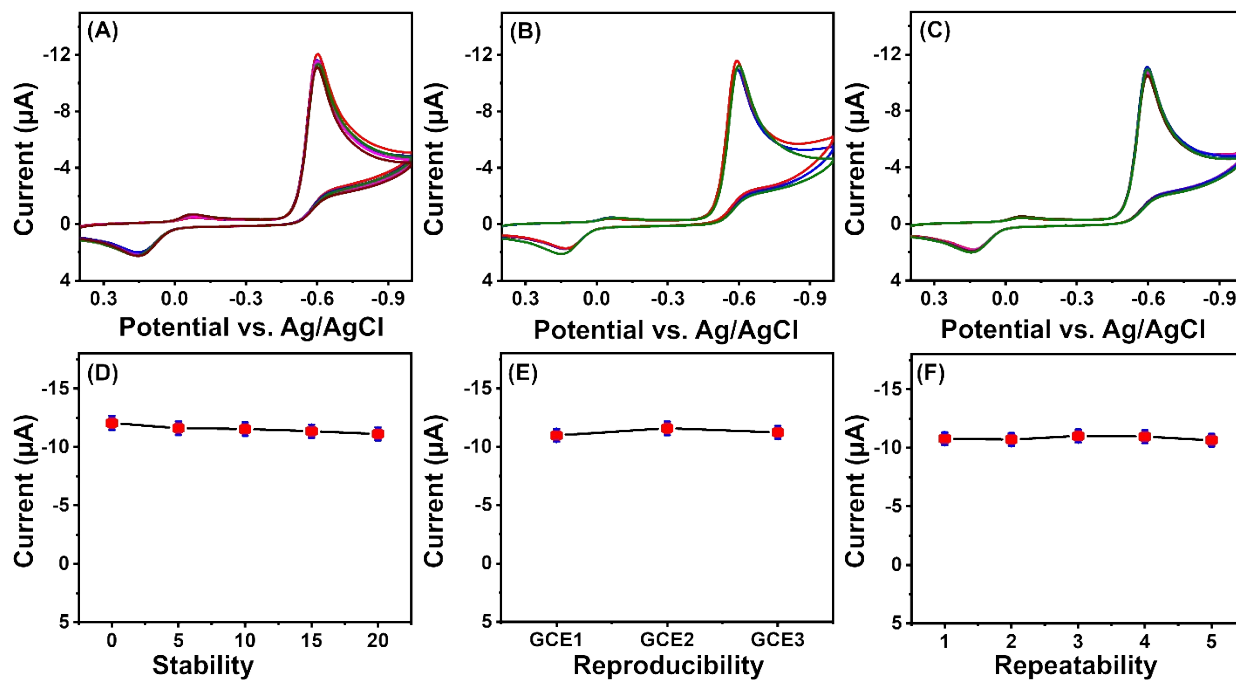

**Fig. S1.** Cyclic voltammetry curves of FeAlO/SPCE with 75  $\mu\text{M}$  of NTM (A) stability, (B) reproducibility, (C) repeatability, and (D-F) histogram plot of stability, reproducibility, and repeatability.

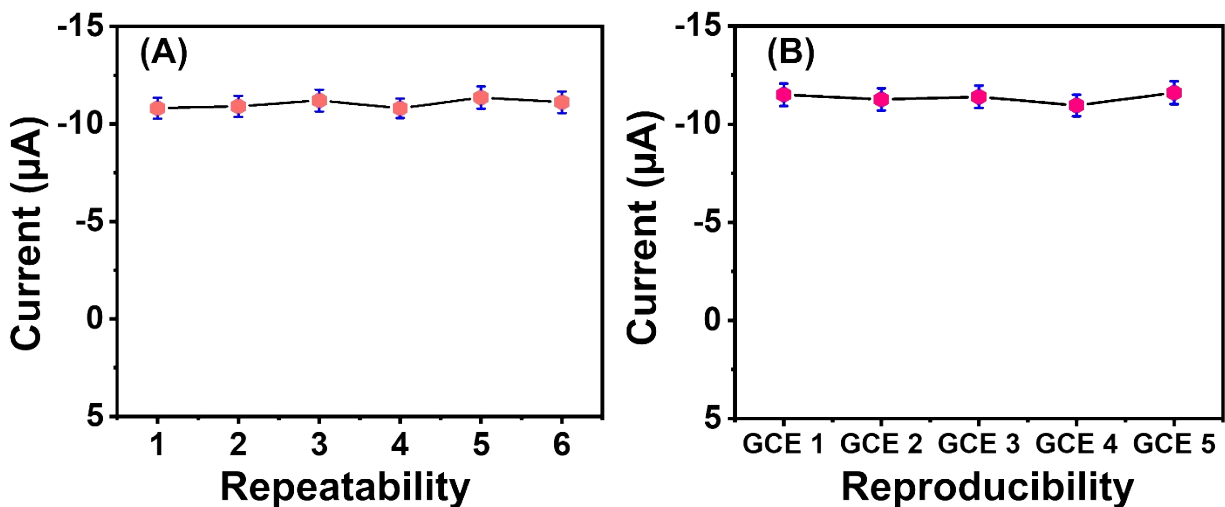

Fig. S2. Histogram plot of repeatability (6 repeated analysis) and reproducibility (5 independent electrodes) analysis studied at FeAlO/SPCE with 75 µM of NTM (A–B).

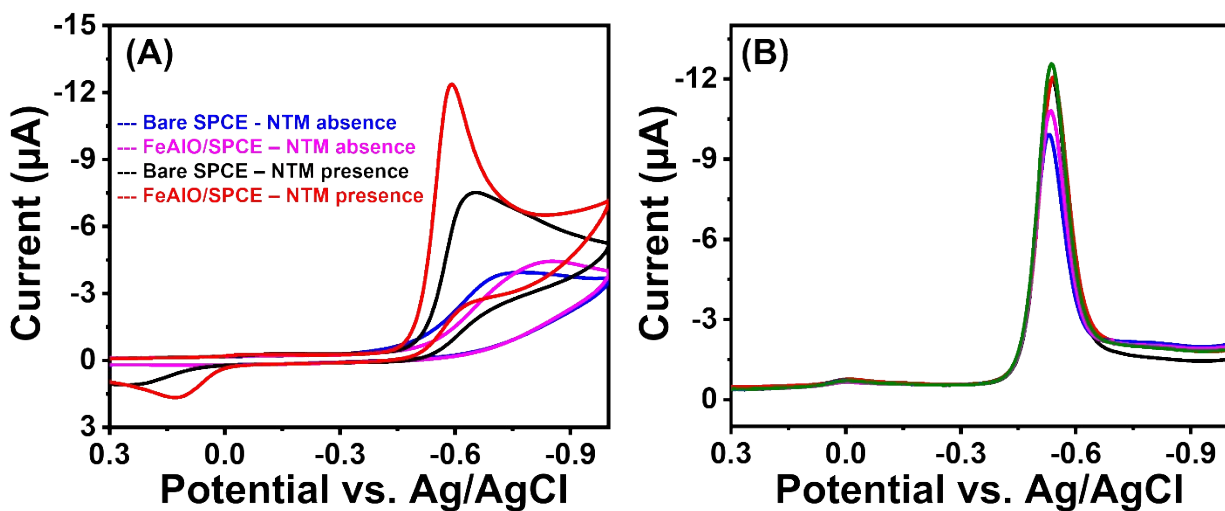

Fig. S3 CV curves studied at bare SPCE, and FeAlO/SPCE with (75.0 µM) and without the addition of NTM at scan rate 0.05 V/s (A) DPV curves of the selectivity analysis studied in 0.1 M of PBS with metal ions Cd<sup>2+</sup>, Cr<sup>2+</sup>, Pb<sup>2+</sup>, and Zn<sup>2+</sup>(B).

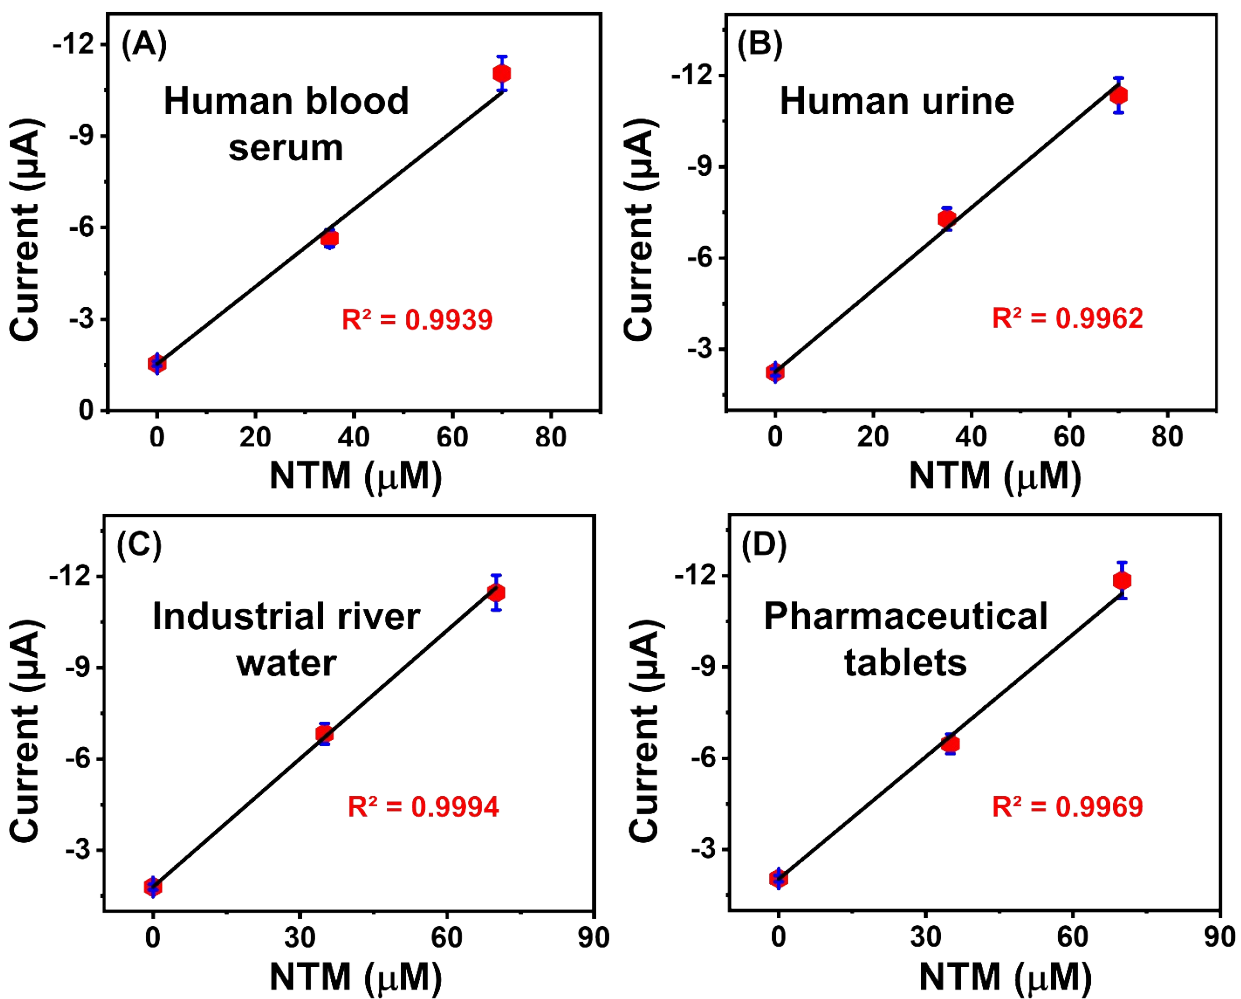

**Fig. S4A–D** Linear plots for real samples analysis done at FeAlO/SPCE for real samples as human blood serum, human urine, industrial river water, and pharmaceutical tablets with NTM vs current.
